# Supplementary material for: Theoretical insight into effect of doping of transition metal M (M = Ni, Pd and Pt) on CO2reduction pathways on Cu(111) and understanding of origin of electrocatalytic activity
Source: Royal Society of Chemistry journal article supplement (doi:10.1039/c6ra28815d), 2017-01-01
Supplement: c6ra28815d1.pdf [file c6ra28815d1.pdf]

# Supporting Information for “Theoretical Insight into Effect of Doping of Transition Metal M (M = Ni, Pd and Pt) on CO<sub>2</sub> Reduction Pathways on Cu(111) and Understanding of Origin of Electrocatalytic Activity”

Lihui Ou<sup>1,2\*</sup>, Wenqi Long<sup>1</sup>, Jianxing Huang<sup>1</sup>, Yuandao Chen<sup>1,2</sup>, Junling Jin<sup>1</sup>

In this paper, DFT calculations were performed to determine the intermediates for formation of CH<sub>4</sub> and CH<sub>3</sub>OH from CO<sub>2</sub> reduction on the transition metal M (M=Ni, Pd and Pt)-doped Cu(111) surface, and the reduction pathways through various possible intermediates are investigated systematically. In the following, we will deduce the most possible pathways for CO<sub>2</sub> reduction into CH<sub>4</sub> and CH<sub>3</sub>OH on transition metal M (M=Ni, Pd and Pt)-doped Cu(111) surface based on the reaction free energies and activation barriers analyses. Thus, the mechanistic insight into effect of doping of transition metal M (M=Ni, Pd and Pt) on CO<sub>2</sub> reduction into CH<sub>4</sub> and CH<sub>3</sub>OH can be obtained. For comparison, the reduction pathways of CO<sub>2</sub> into CH<sub>4</sub> and CH<sub>3</sub>OH on pure Cu(111) surface as included in our previous DFT study were also given.<sup>1</sup>

## 1. Reduction mechanism of CO<sub>2</sub> on the pure Cu(111) surface

Our previous DFT study<sup>1</sup> showed that by dissociative hydrogenation of CO<sub>2</sub>, CO<sub>ads</sub> is firstly formed on the pure Cu(111) surface, the CHO<sub>ads</sub> and CH<sub>2</sub>O<sub>ads</sub> are the key intermediates towards the reduction of CO<sub>2</sub> into CH<sub>4</sub>. Regardless of being the thermodynamics or kinetics, it is likely that CH<sub>2</sub>OH<sub>ads</sub> instead of CH<sub>3</sub>O<sub>ads</sub> is the intermediate for CH<sub>4</sub> and CH<sub>3</sub>OH formations. Based on the activation barriers, the CH<sub>2</sub>OH<sub>ads</sub> intermediate is more easily to form CH<sub>2</sub><sub>ads</sub> intermediate and CH<sub>3</sub>OH by hydrogenative dissociation and direct hydrogenation on pure Cu(111) surface, respectively, which may be parallel pathways. Finally, the CH<sub>2</sub> intermediate can lead to formation of the CH<sub>4</sub> by serial hydrogenation. The relatively slow steps include CO<sub>2</sub>(g) + H\* → (CO + OH)\* and (CO + H)\* → CHO\* on the pure Cu(111) surface. Based on MEP calculation results, the optimal reaction paths for CO<sub>2</sub> reduction to CH<sub>4</sub> and CH<sub>3</sub>OH production on the pure Cu(111) surface can be summarized in Table S1.

---

<sup>1</sup>College of Chemistry and Materials Engineering, Hunan University of Arts and Science, Changde 415000, China.

<sup>2</sup>Hunan Province Cooperative Innovation Center for the Construction & Development of Dongting Lake Ecologic Economic Zone, Hunan University of Arts and Science, Changde 415000, China.

Electronic supplementary information (ESI) available.

**Table S1** The minimum energy paths for CO<sub>2</sub> reduction into CH<sub>4</sub> and CH<sub>3</sub>OH and the activation barriers ( $E_{\text{act}}$ ) and reaction free energies ( $E_{\text{reac}}$ ) in each elementary step on the pure Cu(111) surface

| Reaction paths                                                       | $\Delta G_{\text{reac}}$ (eV) | $E_{\text{act}}$ (eV) |
|----------------------------------------------------------------------|-------------------------------|-----------------------|
| CO <sub>2</sub> (g) + H* → (CO + OH)*                                | 0.27                          | 1.18                  |
| (CO + H)* → CHO*                                                     | 0.86                          | 1.06                  |
| (CHO + H)* → CH <sub>2</sub> O*                                      | -0.21                         | 0.72                  |
| (CH <sub>2</sub> O + H)* → (CH <sub>2</sub> + OH)*                   | 0.01                          | 1.12                  |
| (CH <sub>2</sub> O + H)* → CH <sub>2</sub> OH*                       | 0.13                          | 0.95                  |
| (CH <sub>2</sub> O + H)* → CH <sub>3</sub> O*                        | -1.05                         | 1.86                  |
| (CH <sub>2</sub> OH + H)* → CH <sub>2</sub> * + H <sub>2</sub> O (l) | -0.19                         | 0.66                  |
| (CH <sub>2</sub> OH + H)* → CH <sub>3</sub> OH (l)                   | -0.95                         | 0.68                  |
| (CH <sub>2</sub> + H)* → CH <sub>3</sub> *                           | -0.83                         | 0.63                  |
| (CH <sub>3</sub> + H)* → CH <sub>4</sub> (g)                         | -0.80                         | 1.03                  |

## 2. The possible CO<sub>2</sub> reduction pathways on the Ni-doped Cu(111) surface

### 2.1 Formation pathways of key intermediate CO on the Ni-doped Cu(111) surface

The formation of key intermediate CO is initial step during the course of CO<sub>2</sub> reduction. The calculated minimum energy paths (MEPs) for these possible initial steps for CO formation via direct dissociation and hydrogenative dissociation of CO<sub>2</sub> on the Ni-doped Cu(111) surface are shown in Fig. S1. The geometry structures of the corresponding reactants, products, and reaction intermediates are also displayed in Fig. S1. For intermediate CO formation on the Ni-doped Cu(111) surface, the reaction free energy is calculated as -0.23 eV through hydrogenative dissociation of CO<sub>2</sub>, whereas it is -0.06 eV through CO<sub>2</sub> direct dissociation, which showed the former may be more favorable pathway thermodynamically for CO formation. The corresponding activation barriers for these both processes are 0.40 and 0.72 eV, respectively, indicating that hydrogenative dissociation of CO<sub>2</sub> into CO require lower activation barrier, which follow the same trend as the reaction free energies. Thus, both the thermodynamic and kinetic studies suggest that the more preferred pathway of CO formation may be via hydrogenative dissociation of CO<sub>2</sub> on the Ni-modified Cu(111) surface.

Intermediate COOH may be able to be formed during the course of CO<sub>2</sub> hydrogenative dissociation into CO. Thus, we perform the MEPs analysis for COOH formation and subsequent dissociation processes on the Ni-doped Cu(111) surface. As shown in Fig. S2, these both processes are all exothermic, and the corresponding reaction free energies are -0.19 and -0.59 eV, respectively, indicating that COOH formation

through CO<sub>2</sub> hydrogenation and dissociation through dehydroxylation are thermodynamically favorable pathways on the Ni-doped Cu(111) surface. The activation barrier for COOH formation is 0.39 eV, which is approximately equal with that of CO formation through CO<sub>2</sub> hydrogenative dissociation. Furthermore, a very low activation barrier of *ca.* 0.16 eV is required for subsequent COOH dissociation into CO, which is almost thermo-activation process. Thereby, we can conclude that CO<sub>2</sub> hydrogenative dissociation into CO may be not an elementary reaction step, which may contain an intermediate COOH on the Ni-doped Cu(111) surface.

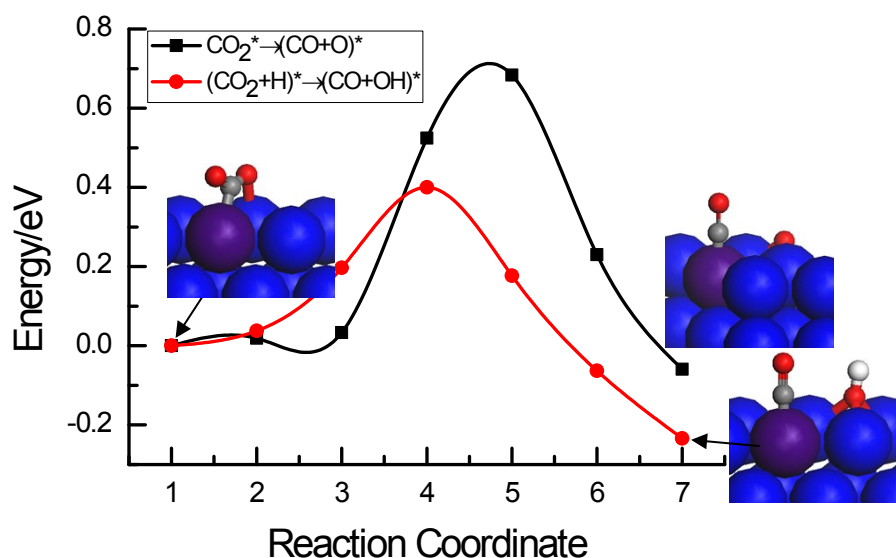

**Fig. S1** MEPs of the two possible initial steps for CO formation during the course of CO<sub>2</sub> reduction on the Ni-doped Cu(111) surface. Carbon atoms are gray, hydrogen atoms are white, oxygen atoms are red, nickel atom is purple, and copper atoms are blue.

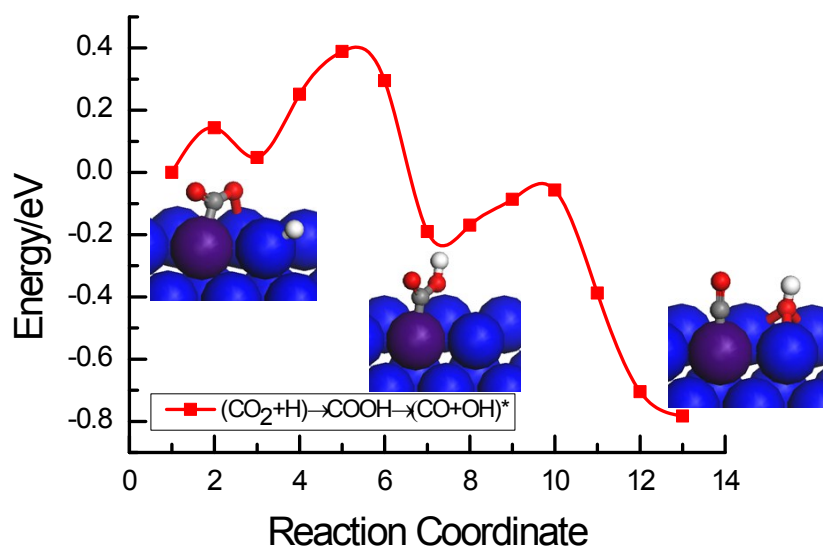

**Fig. S2** MEPs for possible intermediate COOH formation and COOH subsequent reduction into CO during the course of CO<sub>2</sub> reduction on the Ni-doped Cu(111) surface.

On the pure Cu(111) surface, COOH is also a possible reaction intermediate during the course of CO<sub>2</sub>

hydrogenative dissociation into CO. However, an activation barrier of 1.18 eV is required, which is considerably higher than that for the corresponding process of Ni-doped Cu(111) surface. Thus, the activation barrier for CO formation can be reduced significantly by the doping of Ni, which may be ascribed to that Ni activates the CO<sub>2</sub> since the chemisorbed CO<sub>2</sub> molecule is observed on the top sites of Ni on the surface and promotes the reduction process of CO<sub>2</sub>.

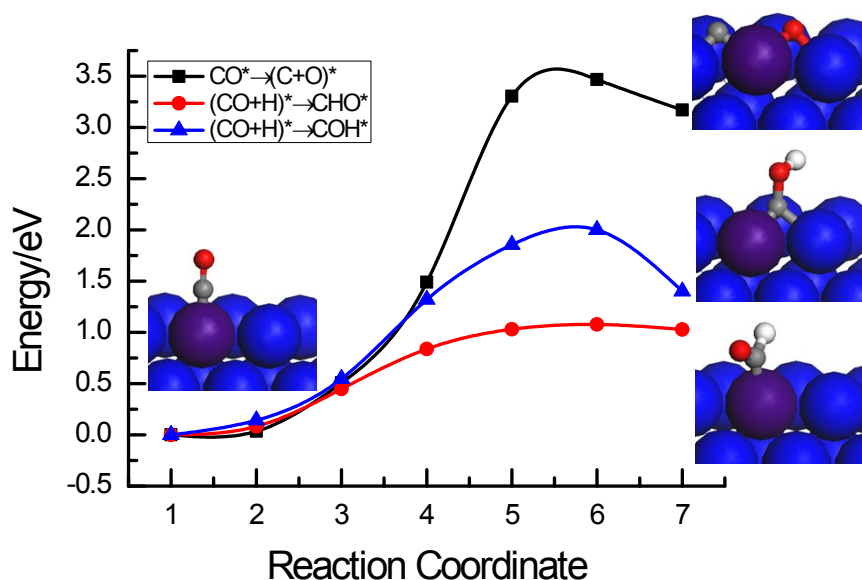

**Fig. S3** MEPs of formation processes of C, CHO and COH through CO dissociation and hydrogenation on the Ni-modified Cu(111) surface.

## 2.2 Reduction pathways of key intermediate CO on the Ni-doped Cu(111) surface

Three possible reactions pathways are considered for CO further reduction on the Ni-doped Cu(111) surface, namely, direct dissociation via C-O bond cleavage into adsorbed C and O atoms, hydrogenation into form an adsorbed formyl (CHO), and hydrogenation into form an adsorbed hydroxymethylidyne (COH). The thermodynamic analyses show that these three possible reaction pathways are all endothermic processes, in which CO direct dissociation is the most endothermic process thermodynamically with a reaction free energy of 3.17 eV, whereas the reaction free energy is the least positive, *ca.* 1.03 eV for CHO intermediate formation through CO hydrogenation. The thermodynamic results show that the most favorable pathway for CO further reduction on the Ni-doped Cu(111) surface is CHO formation via hydrogenation. Based on the MEPs analyses in Fig. S3, the activation barriers for the corresponding pathways are 3.58, 2.04 and 1.08 eV, respectively, in which the highest activation barrier is required for CO direct dissociation, and the activation barrier for intermediate CHO formation is nearly 1.0 eV lower than COH formation. On this basis, we are able to conclude that the most favorable reaction pathway in CO further reduction is CO hydrogenation into CHO on the Ni-doped Cu(111) surface.

### 2.3 Further reduction of intermediate CHO on the Ni-doped Cu(111) surface

On the Ni-doped Cu(111) surface, there may be exist four possible pathways for intermediate CHO further reduction, including direct dissociation into adsorbed CH and O through C-O bond cleavage, and C and OH through C-H and C-O bonds breaking, hydrogenation into form adsorbed intermediates CH<sub>2</sub>O and CHOH. As shown in Fig. S4, among the four possibilities of CHO further reduction, only CHO hydrogenation into CH<sub>2</sub>O has negative reaction free energy (*ca.* -0.04 eV), whereas other three pathways are all endothermic processes, suggesting thermodynamically that CH<sub>2</sub>O formation pathway is the most favorable. Simultaneously, the kinetic analyses from MEPs also show that the lowest activation barrier is required for intermediate CHO hydrogenation into CH<sub>2</sub>O (*ca.* 0.28 eV). The activation barriers are 1.52, 2.31, and 0.95 eV, respectively for direct dissociation into CH+O and C+OH, and hydrogenation into CHOH. Therefore, we can conclude that CH<sub>2</sub>O should be a key intermediate during the course of CO<sub>2</sub> reduction into hydrocarbons on the Ni-doped Cu(111) surface.

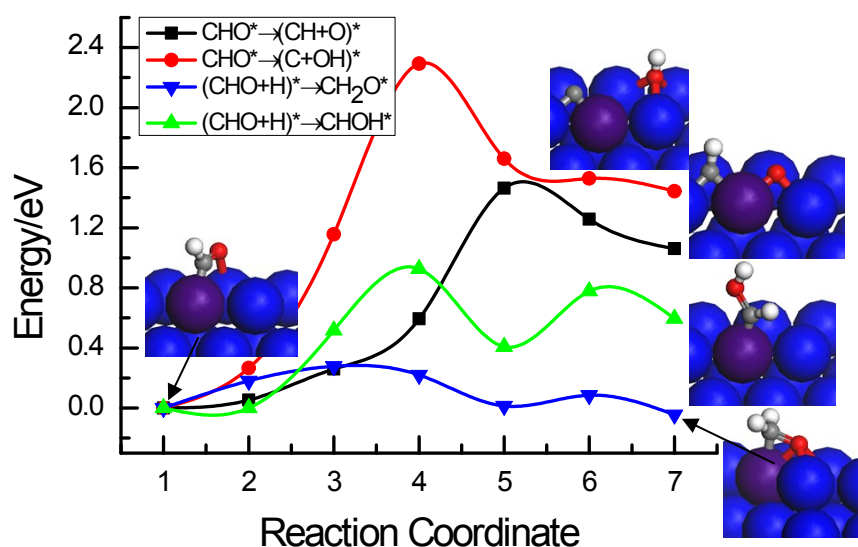

Fig. S4 MEPs of four possibility of CHO further reduction on the Ni-doped Cu(111) surface.

### 2.4 Subsequent reduction pathways of CH<sub>2</sub>O on the Ni-doped Cu(111) surface

For intermediate CH<sub>2</sub>O further reduction on the Ni-doped Cu(111) surface, it may undergo direct dissociation into adsorbed CH<sub>2</sub> and O, direct hydrogenation into adsorbed intermediates CH<sub>3</sub>O and CH<sub>2</sub>OH, and hydrogenative dissociation into adsorbed CH<sub>2</sub> and OH. The calculated reaction free energies for direct dissociation through C-O bond breaking and hydrogenative dissociation into CH<sub>2</sub> are 0.67 and 0.06 eV, respectively, while for formation of adsorbed CH<sub>3</sub>O and CH<sub>2</sub>OH through direct hydrogenation they are -0.60 and -0.08 eV, respectively. This seems to show thermodynamically that CH<sub>3</sub>O formation via CH<sub>2</sub>O direct hydrogenation is the most preferable pathway among four possibilities. Based on the MEPs studies, the

activation barriers are 0.93, 0.24, 0.27, and 0.24 eV for these four possible pathways, respectively, as shown in Fig. S5. Thereinto, CH<sub>3</sub>O and CH<sub>2</sub>OH formation, and CH<sub>2</sub>O hydrogenative dissociation into CH<sub>2</sub> have nearly equal and lower activation barriers than CH<sub>2</sub>O direct dissociation. Therefore, although the reaction free energy for CH<sub>2</sub>OH formation is less exothermic than CH<sub>3</sub>O formation, and it is even slightly endothermic for CH<sub>2</sub>O hydrogenative dissociation into CH<sub>2</sub>, CH<sub>3</sub>O and CH<sub>2</sub>OH formation through direct hydrogenation, and CH<sub>2</sub> formation through hydrogenative dissociation are all more favorable reaction pathways kinetically on the Ni-doped Cu(111) surface. They may be parallel pathways after alloying Cu with Ni.

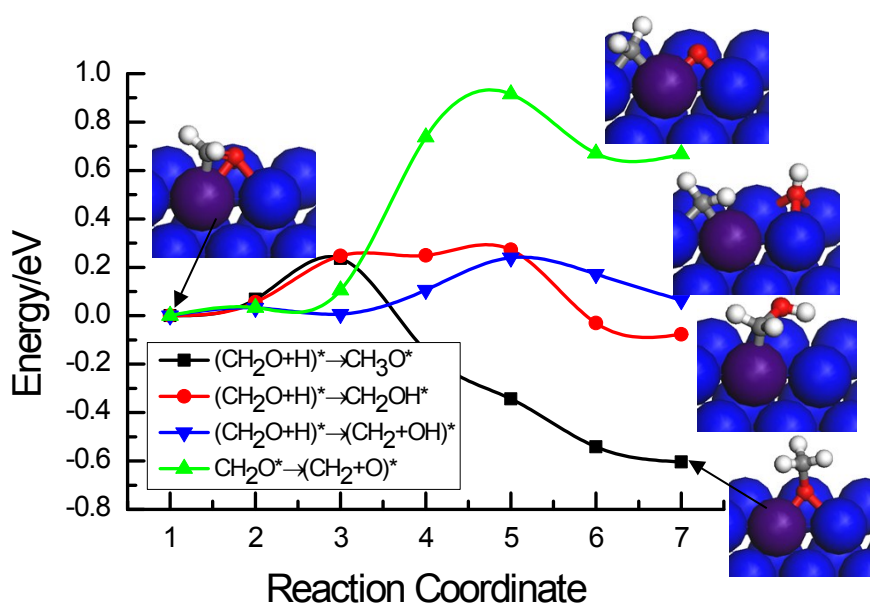

**Fig. S5** MEPs of CH<sub>3</sub>O, CH<sub>2</sub>OH, and CH<sub>2</sub> formations through direct hydrogenation, hydrogenative dissociation, and direct dissociation of CH<sub>2</sub>O on the Ni-doped Cu(111) surface.

## 2.5 Subsequent reduction pathways of CH<sub>3</sub>O and CH<sub>2</sub>OH on the Ni-doped Cu(111) surface

Based on the above thermodynamic and kinetic analysis, CH<sub>3</sub>O and CH<sub>2</sub>OH may be reaction intermediates during the course of CO<sub>2</sub> reduction into hydrocarbons on the Ni-doped Cu(111) surface. The CH<sub>3</sub>O further reduction is examined firstly. There may be exist three possibilities, including CH<sub>3</sub>O direct dissociation into adsorbed CH<sub>3</sub>+O through C-O bond cleavage, hydrogenation into CH<sub>3</sub>OH, and hydrogenative dissociation into CH<sub>4</sub> and CH<sub>3</sub>+OH. The consideration of CH<sub>4</sub> formation through hydrogenative dissociation is due to previous theoretical study on the Cu(211) surface from Nørskov and coauthors thermodynamically suggested that CH<sub>4</sub> can be produced by CH<sub>3</sub>O hydrogenation.<sup>2</sup> Based on our present thermodynamic analyses, the calculated reaction free energy for CH<sub>4</sub> formation through CH<sub>3</sub>O hydrogenative dissociation is -0.32 eV, whereas the reaction free energies of 0.39, 0.32 and 0.31 eV are

required for  $\text{CH}_3+\text{O}$ ,  $\text{CH}_3+\text{OH}$  and  $\text{CH}_3\text{OH}$  formations, respectively. This seems to suggest that  $\text{CH}_3\text{O}$  hydrogenative dissociation into  $\text{CH}_4$  is also preferable pathway on the Ni-doped Cu(111) surface, as demonstrated thermodynamically in Nørskov and coauthors' work. However, our present kinetic studies show that an activation barrier of 0.90 eV is required for hydrogenative dissociation into  $\text{CH}_4$ , which are higher than that of  $\text{CH}_3\text{O}$  direct hydrogenation into  $\text{CH}_3\text{OH}$  (*ca.* 0.68 eV), as shown in Fig. S6. In the mean time, high activation barriers of 0.95 and 1.96 eV for  $\text{CH}_3\text{O}$  direct and hydrogenative dissociation into  $\text{CH}_3+\text{O}$  and  $\text{CH}_3+\text{OH}$  are also required. Thus, direct hydrogenation into  $\text{CH}_3\text{OH}$  should be the most preferred reaction pathway among  $\text{CH}_3\text{O}$  further reduction on the Ni-doped Cu(111) surface due to relatively lower activation barrier.

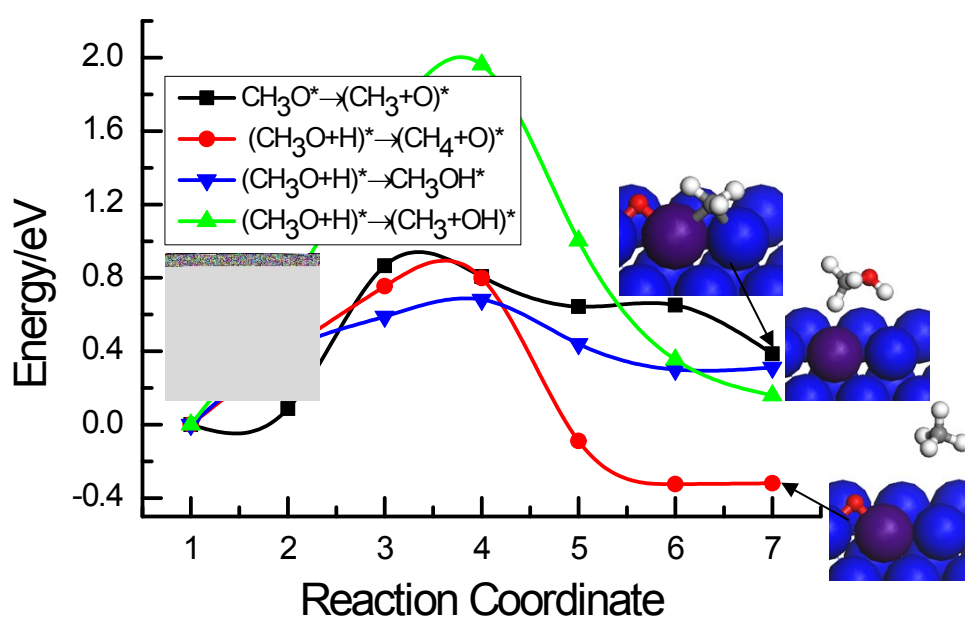

**Fig. S6** MEPs of  $\text{CH}_3$ ,  $\text{CH}_4$ , and  $\text{CH}_3\text{OH}$  formation through  $\text{CH}_3\text{O}$  direct dissociation, hydrogenative dissociation, and direct hydrogenation on the Ni-doped Cu(111) surface.

For intermediate  $\text{CH}_2\text{OH}$  further reduction, there possible reaction pathways are considered, such as direct dissociation into adsorbed  $\text{CH}_2$  through C-O bond breaking, hydrogenative dissociation into adsorbed  $\text{CH}_2$ , and direct hydrogenation into  $\text{CH}_3\text{OH}$ . The reaction free energies of -0.03, -0.13, and -0.61 eV are required for these three reaction pathways, respectively, in which the most exothermic pathway is  $\text{CH}_3\text{OH}$  formation through direct hydrogenation. This indicates thermodynamically that  $\text{CH}_3\text{OH}$  formation is the most favorable among these three possibilities on the Ni-doped Cu(111) surface. Simultaneously, it is also observed in Fig. S7 that  $\text{CH}_3\text{OH}$  formation through  $\text{CH}_2\text{OH}$  direct hydrogenation has the lowest activation barrier (*ca.* 0.16 eV) than  $\text{CH}_2$  formation through direct and hydrogenative dissociation with activation barriers of 0.95 and 0.58 eV, respectively. Thus, the intermediate  $\text{CH}_2\text{OH}$  tends to form  $\text{CH}_3\text{OH}$  by direct hydrogenation after alloying Cu with Ni, which is relatively more facile in contrast with  $\text{CH}_2$  formation.

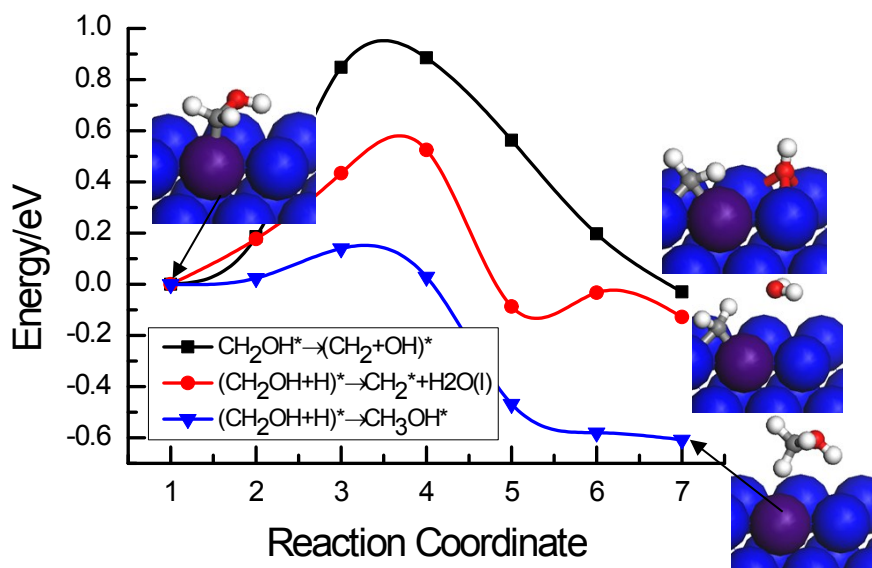

**Fig. S7** MEPs of CH<sub>3</sub>OH and CH<sub>2</sub> formation through direct hydrogenation, hydrogenative dissociation, and direct dissociation of CH<sub>2</sub>OH on the Ni-doped Cu(111) surface.

## 2.6 CH<sub>4</sub> formation pathways on the Ni-doped Cu(111) surface

Since CH<sub>3</sub> and CH<sub>4</sub> formation through the direct and hydrogenative dissociation of CH<sub>3</sub>O on the Ni-doped Cu(111) surface is more difficult than the formation of CH<sub>2</sub> based on the above thermodynamic and kinetic analyses, the final CH<sub>4</sub> production is possibly to be formed by intermediate CH<sub>2</sub> serial hydrogenation. Four possible formation pathways of CH<sub>2</sub> have been shown above including CH<sub>2</sub>O direct and hydrogenative dissociation, CH<sub>2</sub>OH direct and hydrogenative dissociation. The lowest activation barrier (*ca.* 0.24 eV) is required by CH<sub>2</sub>O hydrogenative dissociation into CH<sub>2</sub>, thereby this pathway is the most favorable for CH<sub>2</sub> formation on Ni-modified Cu(111) surface. The MEPs of CH<sub>4</sub> formation through intermediate CH<sub>2</sub> serial hydrogenation is shown in Fig. S8. The reaction free energies are calculated as -0.55 and -0.59 eV for CH<sub>3</sub> formation through CH<sub>2</sub> hydrogenation and CH<sub>4</sub> formation through CH<sub>3</sub> hydrogenation, respectively. These two pathways are all strong exothermic processes, suggesting thermodynamically that they are easily to occur. The calculated activation barriers for the corresponding processes are 0.30 and 0.21 eV, respectively, which are very low and can be overcome at ambient temperature.



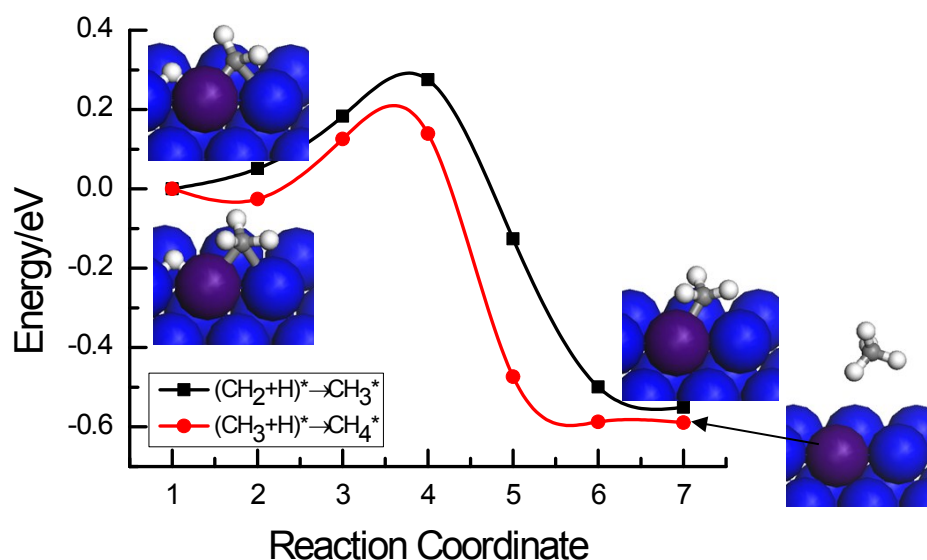

**Fig. S8** MEPs of hydrocarbons CH<sub>3</sub> and CH<sub>4</sub> formation through CH<sub>2</sub> serial hydrogenation on the Ni-doped Cu(111) surface.

### 3. The possible CO<sub>2</sub> reduction pathways on the Pd-doped Cu(111) surface

#### 3.1 The possible initial step of CO<sub>2</sub> reduction on the Pd-doped Cu(111) surface

The calculated minimum energy paths (MEPs) for possible initial steps of CO<sub>2</sub> reduction into CO and COOH via direct dissociation, hydrogenative dissociation and hydrogenation on the Pd-doped Cu(111) surface are shown in Fig. S9. For intermediates CO and COOH formation on the Pd-doped Cu(111) surface, the reaction free energies are calculated as 0.31 and 0.51 eV through hydrogenative dissociation and hydrogenation of CO<sub>2</sub>, respectively, whereas it is 1.02 eV through CO<sub>2</sub> direct dissociation, which showed hydrogenative dissociation into CO and hydrogenation into COOH may be more favorable pathways thermodynamically. The corresponding activation barriers for these three processes are 0.83, 0.72 and 2.09 eV, respectively, indicating that hydrogenative dissociation into CO and hydrogenation of CO<sub>2</sub> into COOH require lower activation barriers, in which the activation barrier for COOH formation is slightly lower than that of CO formation. Furthermore, a low activation barrier of *ca.* 0.42 eV is required with a reaction free energy of -0.19 eV for subsequent COOH dissociation into CO, as shown in Fig. S10. Thereby, we can conclude that CO<sub>2</sub> hydrogenative dissociation into CO is not an elementary reaction step, intermediate COOH may be able to be formed during the course of CO<sub>2</sub> hydrogenative dissociation into CO on the Pd-doped Cu(111) surface.

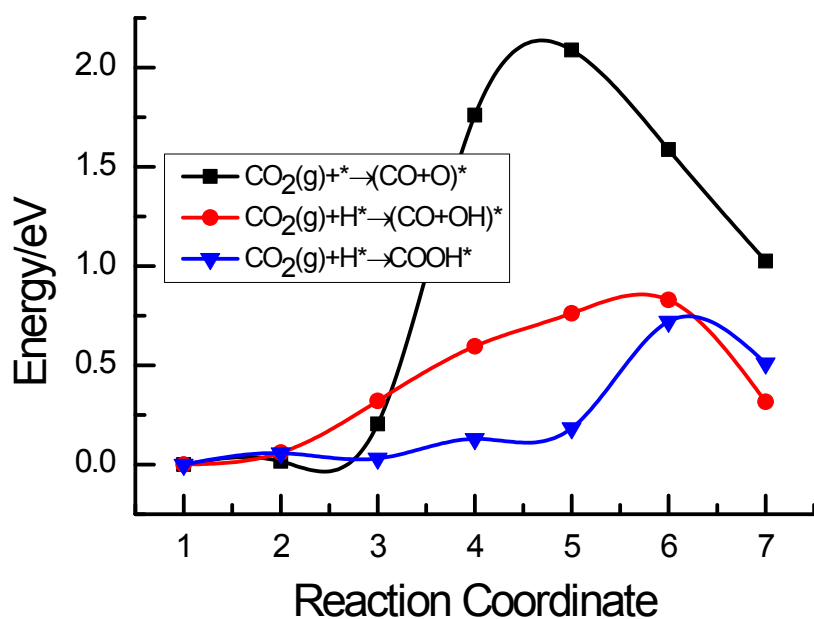

**Fig. S9** MEPs of the possible initial steps for CO<sub>2</sub> reduction into CO and COOH intermediates on the Pd-doped Cu(111) surface.

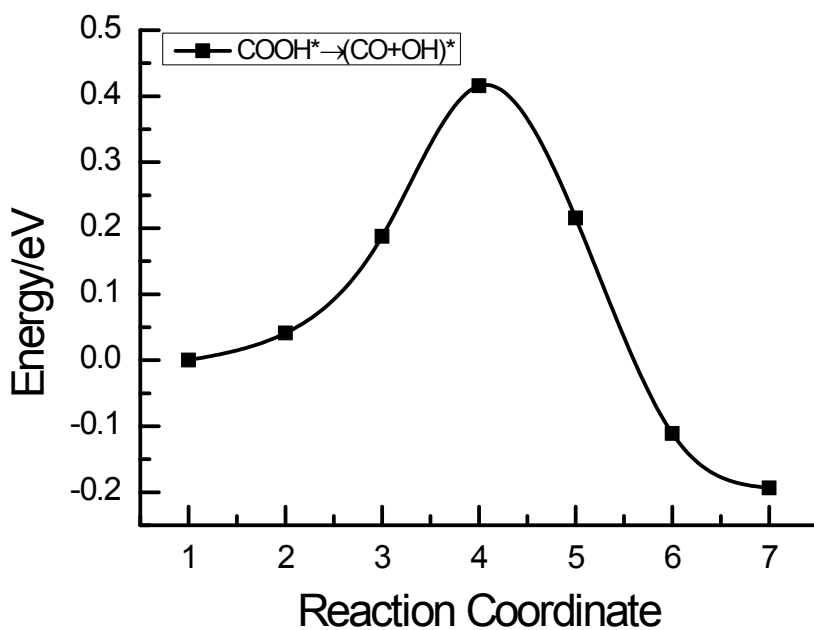

**Fig. S10** MEPs for possible intermediate COOH reduction into CO during the course of CO<sub>2</sub> reduction on the Pd-doped Cu(111) surface.

### 3.2 Reduction pathways of key intermediate CO on the Pd-doped Cu(111) surface

Three possible reactions pathways are considered for CO further reduction on the Pd-doped Cu(111) surface, namely, direct dissociation via C-O bond cleavage into adsorbed C and O atoms, hydrogenation into form an adsorbed formyl (CHO), and hydrogenation into form an adsorbed hydroxymethylidyne (COH). The thermodynamic analyses show that these three possible reaction pathways are all endothermic processes, in

which CO direct dissociation is the most endothermic process thermodynamically with a reaction free energy of 3.55 eV, whereas the reaction free energy is the least positive, *ca.* 0.52 eV for CHO intermediate formation through CO hydrogenation. The thermodynamic results show that the most favorable pathway for CO further reduction on the Pd-doped Cu(111) surface is CHO formation via hydrogenation. Based on the MEPs analyses in Fig. S11, the activation barriers for the corresponding pathways are 4.04, 1.19 and 0.87 eV, respectively, in which the highest activation barrier is required for CO direct dissociation, and the activation barrier for intermediate CHO formation is nearly 0.32 eV lower than COH formation. On this basis, we are able to conclude that the most favorable reaction pathway in CO further reduction is CO hydrogenation into CHO on the Pd-doped Cu(111) surface.

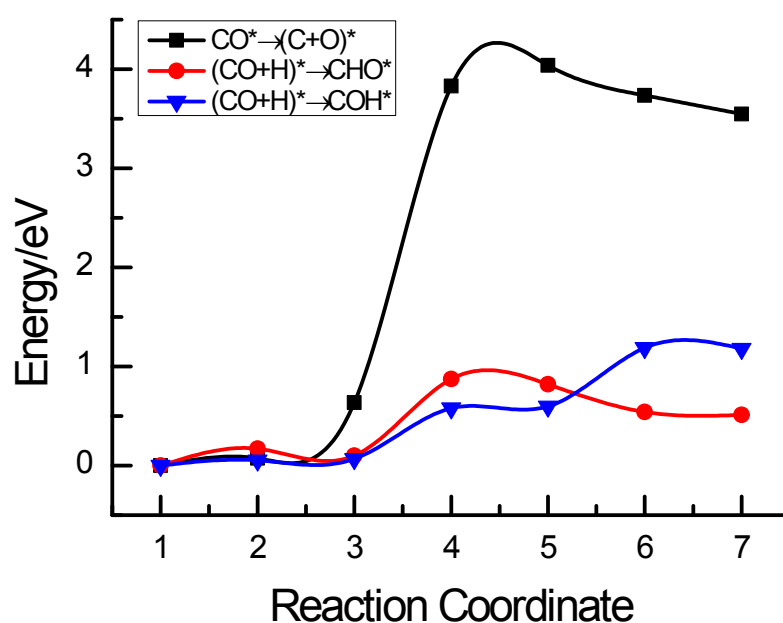

**Fig. S11** MEPs of formation processes of C, CHO and COH through CO dissociation and hydrogenation on Pd-modified Cu(111) surface.

### 3.3 Further reduction of intermediate CHO on the Pd-doped Cu(111) surface

Four possible pathways for intermediate CHO further reduction are considered on the Pd-doped Cu(111) surface, including direct dissociation into adsorbed CH and O through C-O bond cleavage, and C and OH through C-H and C-O bonds breaking, hydrogenation into form adsorbed intermediates  $\text{CH}_2\text{O}$  and  $\text{CHOH}$ . As shown in Fig. S12, among the four possibilities, only CHO hydrogenation into  $\text{CH}_2\text{O}$  has negative reaction free energy (*ca.* -0.25 eV), whereas other three pathways are all endothermic processes, suggesting thermodynamically that  $\text{CH}_2\text{O}$  formation pathway is the most favorable. Simultaneously, the kinetic analyses from MEPs also show that the lowest activation barrier is required for intermediate CHO hydrogenation into

$\text{CH}_2\text{O}$  (ca. 0.10 eV). The activation barriers are 2.10, 2.65, and 0.68 eV for direct dissociation into  $\text{CH} + \text{O}$  and  $\text{C} + \text{OH}$ , and hydrogenation into  $\text{CHOH}$ , respectively. Therefore, we can conclude that  $\text{CH}_2\text{O}$  should be a key intermediate during the course of  $\text{CO}_2$  reduction into hydrocarbons on the Pd-doped  $\text{Cu}(111)$  surface.

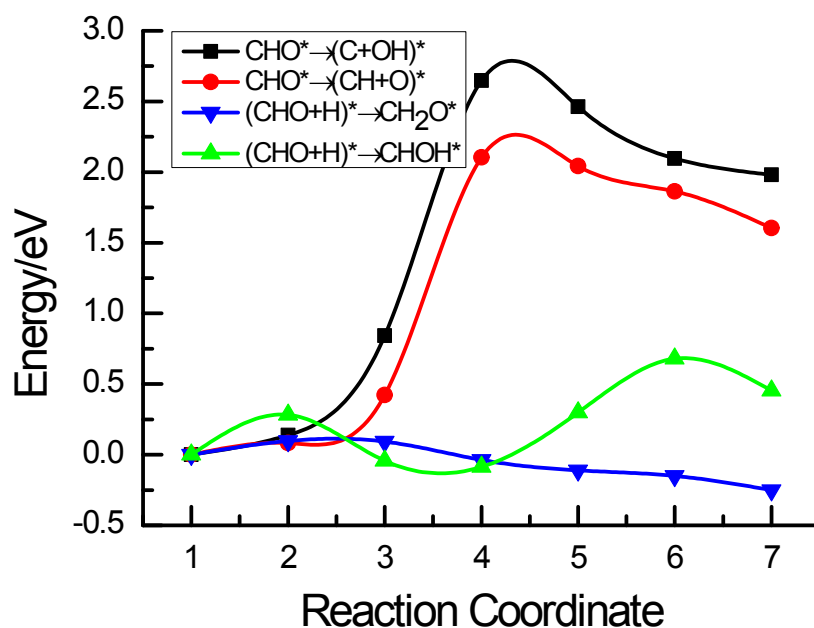

**Fig. S12** MEPs of four possibility of  $\text{CHO}$  further reduction on the Pd-doped  $\text{Cu}(111)$  surface.

### 3.4 Subsequent reduction pathways of $\text{CH}_2\text{O}$ on the Pd-doped $\text{Cu}(111)$ surface

For intermediate  $\text{CH}_2\text{O}$  further reduction on the Pd-doped  $\text{Cu}(111)$  surface, it may undergo direct dissociation into adsorbed  $\text{CH}_2$  and  $\text{O}$ , direct hydrogenation into adsorbed intermediates  $\text{CH}_3\text{O}$  and  $\text{CH}_2\text{OH}$ , and hydrogenative dissociation into adsorbed  $\text{CH}_2$  and  $\text{OH}$ . The calculated reaction free energies for direct dissociation through C-O bond breaking and hydrogenative dissociation into  $\text{CH}_2$  are 1.00 and 0.24 eV, respectively, while for formation of adsorbed  $\text{CH}_3\text{O}$  and  $\text{CH}_2\text{OH}$  through direct hydrogenation they are -0.80 and -0.12 eV, respectively. This shows thermodynamically that  $\text{CH}_3\text{O}$  formation via  $\text{CH}_2\text{O}$  direct hydrogenation is the most preferable pathway among four possibilities. Based on the MEPs studies, the activation barriers are 1.58, 0.52, 0.06, and 0.68 eV for these four possible pathways, respectively, as shown in Fig. S13. Thereinto,  $\text{CH}_3\text{O}$  formation requires the lowest activation barriers, which is a non-activated process. Therefore, thermodynamic and kinetic studies all show that  $\text{CH}_3\text{O}$  formation through  $\text{CH}_2\text{O}$  direct hydrogenation is the most favorable pathways among four possibilities on the Pd-doped  $\text{Cu}(111)$  surface.

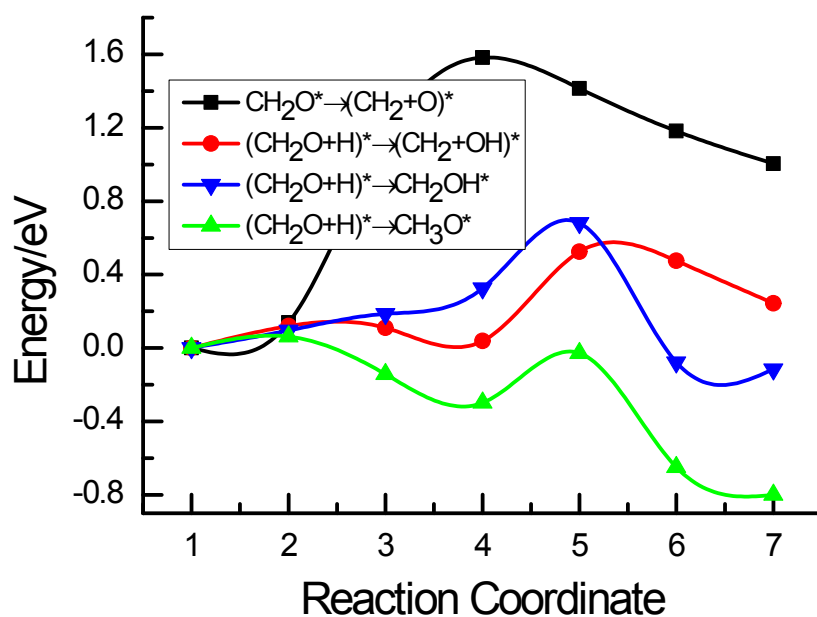

**Fig. S13** MEPs of CH<sub>3</sub>O, CH<sub>2</sub>OH, and CH<sub>2</sub> formations through direct hydrogenation, hydrogenative dissociation, and direct dissociation of CH<sub>2</sub>O on the Pd-doped Cu(111) surface.

### 3.5 Subsequent reduction pathways of CH<sub>3</sub>O on the Pd-doped Cu(111) surface

The CH<sub>3</sub>O further reduction is examined. There may be exist four possibilities, including CH<sub>3</sub>O direct dissociation into adsorbed CH<sub>3</sub>+O through C-O bond cleavage, hydrogenation into CH<sub>3</sub>OH, and hydrogenative dissociation into CH<sub>4</sub> and CH<sub>3</sub>+OH. Based on our present thermodynamic analyses, the calculated reaction free energy for CH<sub>4</sub> formation through CH<sub>3</sub>O hydrogenative dissociation is -0.16 eV, whereas the reaction free energies of 0.53, 0.01 and -0.10 eV are required for CH<sub>3</sub> + O, CH<sub>3</sub> + OH and CH<sub>3</sub>OH formations, respectively. This seems to suggest that CH<sub>3</sub>O hydrogenative dissociation into CH<sub>4</sub> is also preferable pathway on the Pd-doped Cu(111) surface. However, our present kinetic studies show that an activation barrier of 2.81 eV is required for hydrogenative dissociation into CH<sub>4</sub>, which are significantly higher than that of CH<sub>3</sub>O hydrogenative dissociation into CH<sub>3</sub>+OH (*ca.* 0.29 eV), as shown in Fig. S14. In the mean time, high activation barriers of 1.68 and 1.86 eV for CH<sub>3</sub>O direct dissociation and hydrogenation into CH<sub>3</sub>+O and CH<sub>3</sub>OH are also required. Thus, hydrogenative dissociation into CH<sub>3</sub> should be the most preferred reaction pathway among CH<sub>3</sub>O further reduction on the Pd-doped Cu(111) surface due to significantly lower activation barrier.

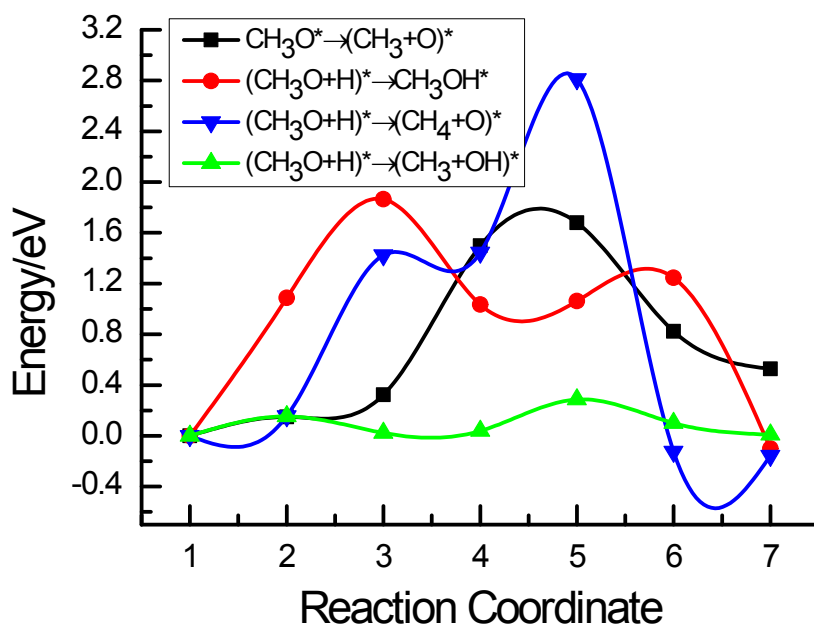

**Fig. S14** MEPs of CH<sub>3</sub>, CH<sub>4</sub>, and CH<sub>3</sub>OH formation through CH<sub>3</sub>O direct dissociation, hydrogenative dissociation, and direct hydrogenation on the Pd-doped Cu(111) surface.

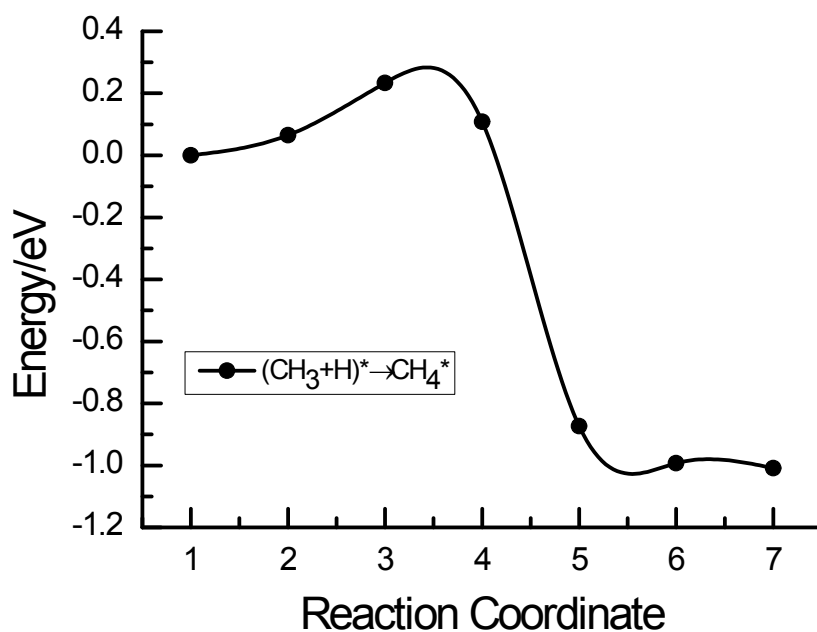

**Fig. S15** MEPs of hydrocarbon CH<sub>4</sub> formation through CH<sub>3</sub> hydrogenation on the Pd-doped Cu(111) surface.

### 3.6 CH<sub>4</sub> formation pathways on the Pd-doped Cu(111) surface

Since the hydrogenative dissociation of CH<sub>3</sub>O into form CH<sub>3</sub> on the Pd-doped Cu(111) surface is the most facile based on the above thermodynamic and kinetic analyses, the final CH<sub>4</sub> production is possibly to be formed by intermediate CH<sub>3</sub> hydrogenation. The MEPs of CH<sub>4</sub> formation through intermediate CH<sub>3</sub> hydrogenation is shown in Fig. S15. The reaction free energy is calculated as -1.01 eV for CH<sub>4</sub> formation through CH<sub>3</sub> hydrogenation. This pathway is strong exothermic processes, suggesting thermodynamically

that it is easily to occur. The calculated activation barrier for the corresponding process is 0.23 eV, which is a thermo-activated process and can be overcome at ambient temperature.

#### 4. The possible CO<sub>2</sub> reduction pathways on the Pt-doped Cu(111) surface

##### 4.1 The possible initial step of CO<sub>2</sub> reduction on the Pt-doped Cu(111) surface

The calculated minimum energy paths (MEPs) for possible initial steps of CO<sub>2</sub> reduction into CO and COOH through direct dissociation, hydrogenative dissociation and hydrogenation on the Pt-doped Cu(111) surface are shown in Fig. S16. For intermediates CO and COOH formation on the Pt-doped Cu(111) surface, the reaction free energies are calculated as 0.07 and 0.25 eV through hydrogenative dissociation and hydrogenation of CO<sub>2</sub>, respectively, whereas it is 0.40 eV through CO<sub>2</sub> direct dissociation, which showed hydrogenative dissociation into CO and hydrogenation into COOH may be more favorable pathways thermodynamically. The corresponding activation barriers for these three processes are 0.65, 0.52 and 0.88 eV, respectively, indicating that hydrogenative dissociation into CO and hydrogenation of CO<sub>2</sub> into COOH require relatively lower activation barriers, in which the activation barrier for COOH formation is slightly lower than that of CO formation. Furthermore, a low activation barrier of *ca.* 0.37 eV is required with a reaction free energy of -0.33 eV for subsequent COOH dissociation into CO, as shown in Fig. S16. Thus, we can conclude that CO<sub>2</sub> hydrogenative dissociation into CO is not an elementary reaction step, intermediate COOH may be able to be formed during the course of CO<sub>2</sub> hydrogenative dissociation into CO on the Pt-doped Cu(111) surface.

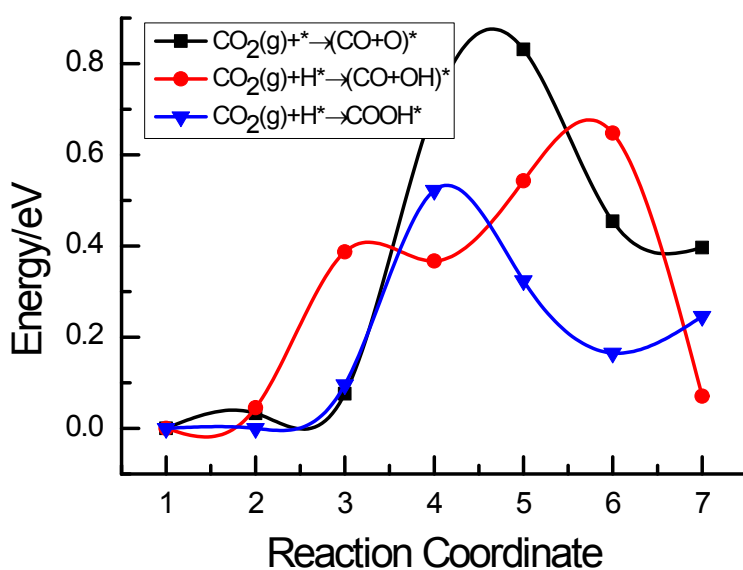

**Fig. S16** MEPs of the possible initial steps for CO<sub>2</sub> reduction into CO and COOH intermediates on the Pt-doped Cu(111) surface.

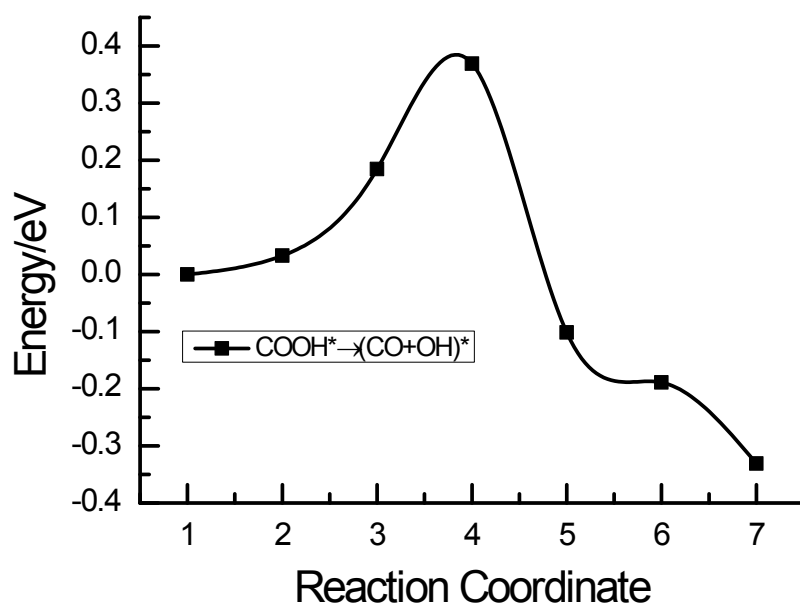

**Fig. S17** MEPs for possible intermediate COOH reduction into CO during the course of CO<sub>2</sub> reduction on the Pt-doped Cu(111) surface.

#### 4.2 Reduction pathways of key intermediate CO on the Pt-doped Cu(111) surface

Three possible reactions pathways are considered for CO further reduction on the Pt-doped Cu(111) surface, namely, direct dissociation via C-O bond cleavage into adsorbed C and O atoms, hydrogenation into form an adsorbed CHO, and hydrogenation into form an adsorbed COH. The thermodynamic analyses show that these three possible reaction pathways are all endothermic processes, in which CO direct dissociation is the most endothermic process thermodynamically with a reaction free energy of 3.75 eV, whereas the reaction free energy is the least positive, *ca.* 0.41 eV for CHO intermediate formation through CO hydrogenation. Thus, the thermodynamic results show that the most favorable pathway for CO further reduction on the Pt-doped Cu(111) surface is CHO formation through hydrogenation. Based on the MEPs analyses in Fig. S18, the activation barriers for the corresponding pathways are 4.45, 1.51 and 0.84 eV, respectively, in which the highest activation barrier is required for CO direct dissociation, and the activation barrier for intermediate CHO formation is nearly 0.67 eV lower than COH formation. On this basis, we are able to conclude that the most favorable reaction pathway in CO further reduction is CO hydrogenation into CHO on the Pt-doped Cu(111) surface.



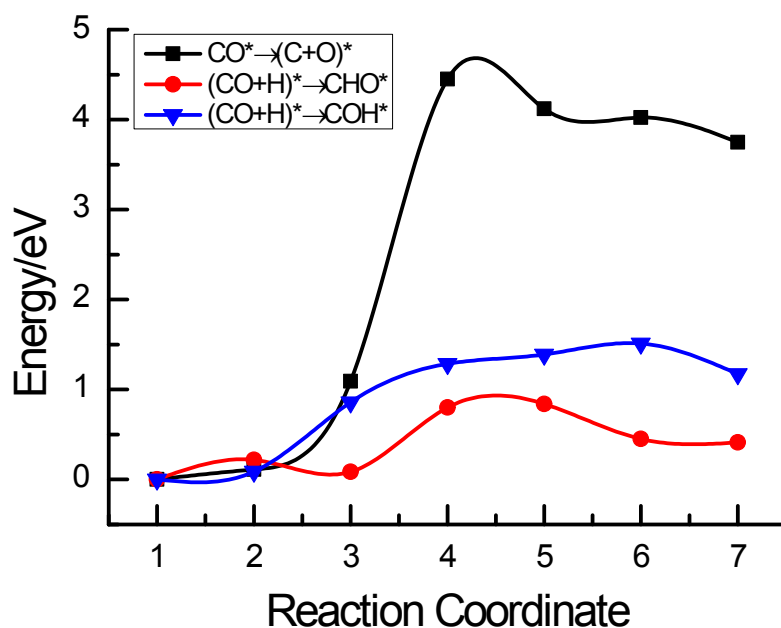

**Fig. S18** MEPs of formation processes of C, CHO and CHOH through CO dissociation and hydrogenation on the Pt-doped Cu(111) surface.

#### 4.3 Further reduction of intermediate CHO on the Pt-doped Cu(111) surface

Four possible pathways for intermediate CHO further reduction are considered on the Pt-doped Cu(111) surface, including direct dissociation into adsorbed CH and O through C-O bond cleavage, and C and OH through C-H and C-O bonds breaking, hydrogenation into form adsorbed intermediates CH<sub>2</sub>O and CHOH. Among the four possibilities, only CHO hydrogenation into CH<sub>2</sub>O has negative reaction free energy (*ca.* -0.02 eV), CHO hydrogenation into CHOH is slightly endothermic (*ca.* 0.37 eV), whereas other two pathways are all strong endothermic processes, as shown in Fig. S19, suggesting thermodynamically that CH<sub>2</sub>O and CHOH formation pathway may be the most favorable. Furthermore, the kinetic analyses from MEPs also show that CHO hydrogenation into CH<sub>2</sub>O and CHOH have nearly equal activation barriers (*ca.* 0.35 and 0.40 eV), which are the lowest among four possibilities. The activation barriers are 2.62 and 2.90 eV for direct dissociation into CH+O and C+OH, respectively. Therefore, it can be concluded that intermediates CH<sub>2</sub>O and CHOH may be able to be formed during the course of CO<sub>2</sub> reduction into hydrocarbons on the Pt-doped Cu(111) surface, which may be parallel pathways.

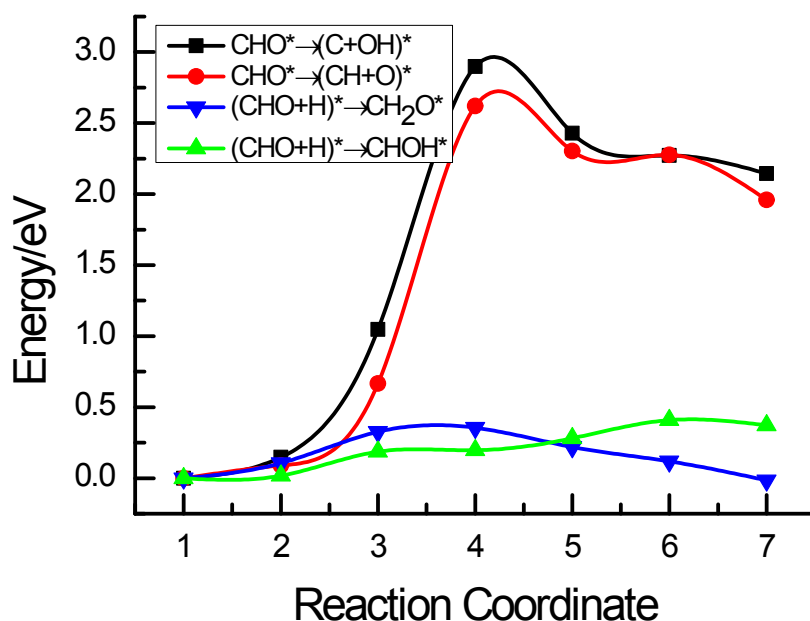

**Fig. S19** MEPs of four possibility of CHO further reduction on the Pt-doped Cu(111) surface.

#### 4.4 Subsequent reduction pathways of CH<sub>2</sub>O and CHOH on the Pt-doped Cu(111) surface

Based on the above analyses, CH<sub>2</sub>O and CHOH are all possible reaction intermediates on the Pd-doped Cu(111) surface. For intermediate CH<sub>2</sub>O further reduction, it may undergo direct dissociation into adsorbed CH<sub>2</sub>+O, direct hydrogenation into adsorbed intermediates CH<sub>3</sub>O and CH<sub>2</sub>OH, and hydrogenative dissociation into adsorbed CH<sub>2</sub>+OH. The calculated reaction free energies for direct dissociation through C-O bond breaking and hydrogenative dissociation into CH<sub>2</sub> are 1.15 and 0.26 eV, respectively, while for formation of adsorbed CH<sub>3</sub>O and CH<sub>2</sub>OH through direct hydrogenation they are -0.62 and -0.35 eV, respectively. This shows thermodynamically that CH<sub>3</sub>O and CH<sub>2</sub>OH formations through CH<sub>2</sub>O direct hydrogenation are the most preferable pathways among four possibilities. Based on the MEPs studies, the activation barriers are 1.60, 0.82, 0.21 and 0.59 eV for these four possible pathways, respectively, as shown in Fig. S20. Thereinto, CH<sub>3</sub>O and CH<sub>2</sub>OH formations require relatively lower activation barriers. Therefore, thermodynamic and kinetic studies all show that CH<sub>3</sub>O and CH<sub>2</sub>OH formations through CH<sub>2</sub>O direct hydrogenation are the most favorable pathways among four possibilities on the Pt-doped Cu(111) surface.

Three possibilities are considered for intermediate CHOH further reduction, including direct dissociation into adsorbed CH+OH, direct hydrogenation into adsorbed CH<sub>2</sub>OH, and hydrogenative dissociation into adsorbed CH<sub>2</sub>+OH. The calculated reaction free energies for direct dissociation and hydrogenative dissociation into CH<sub>2</sub> are 0.46 and -0.21 eV, respectively, while for formation of adsorbed CH<sub>2</sub>OH through direct hydrogenation, it is -0.69 eV. This shows thermodynamically that CH<sub>2</sub>OH formation through CHOH direct hydrogenation is the most preferable pathway among three possibilities. Based on the

MEPs studies, the activation barriers are 1.03, 0.54 and 0.53 eV for these three possible pathways, respectively, as shown in Fig. S21, in which CHO hydrogenative dissociation into CH<sub>2</sub> and hydrogenation into CH<sub>2</sub>OH have relatively lower activation barriers, and they are approximately equal. Therefore, the results show that CH<sub>2</sub> and CH<sub>2</sub>OH formations through CHO hydrogenative dissociation and direct hydrogenation are the most favorable pathways among three possibilities on the Pt-doped Cu(111) surface. However, we note that CHO dissociation back into CH and OH requires a very low activation barrier of 0.04 eV, which is significantly lower than that of CHO further reduction and is a non-activated process. Thus, CHO may be not a stable reaction intermediate.

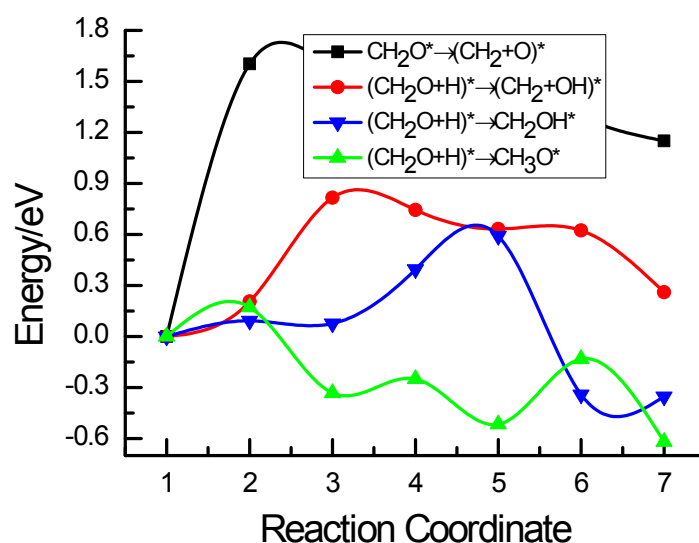

**Fig. S20** MEPs of CH<sub>3</sub>O, CH<sub>2</sub>OH and CH<sub>2</sub> formations through direct hydrogenation, hydrogenative dissociation, and direct dissociation of CH<sub>2</sub>O on the Pt-doped Cu(111) surface.

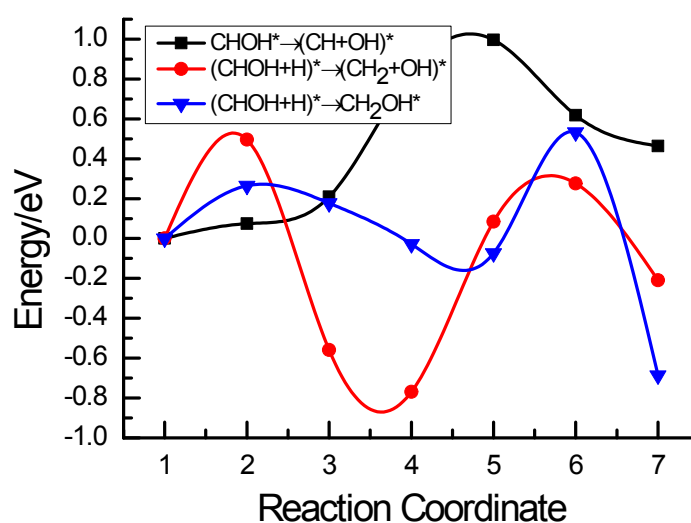

**Fig. S21** MEPs of CH<sub>2</sub>OH, CH<sub>2</sub> and CH formations through direct hydrogenation, hydrogenative dissociation, and direct dissociation of CHO on the Pt-doped Cu(111) surface.

#### 4.5 Subsequent reduction pathways of CH<sub>3</sub>O and CH<sub>2</sub>OH on the Pt-doped Cu(111) surface

Based on the above thermodynamic and kinetic analysis, CH<sub>3</sub>O and CH<sub>2</sub>OH may be reaction intermediates during the course of CO<sub>2</sub> reduction into hydrocarbons on the Pt-doped Cu(111) surface. The CH<sub>3</sub>O further reduction is examined firstly. There may be exist three possibilities, including CH<sub>3</sub>O direct dissociation into adsorbed CH<sub>3</sub>+O through C-O bond cleavage, hydrogenation into CH<sub>3</sub>OH and hydrogenative dissociation into CH<sub>4</sub> and CH<sub>3</sub>+OH. Based on our present thermodynamic analyses, the calculated reaction free energy for CH<sub>4</sub> formation through CH<sub>3</sub>O hydrogenative dissociation is -0.24 eV, whereas the reaction free energies of 0.65, -0.12 and -0.17 eV are required for CH<sub>3</sub>+O, CH<sub>3</sub>+OH and CH<sub>3</sub>OH formations, respectively. This seems to suggest that CH<sub>3</sub>O hydrogenative dissociation into CH<sub>4</sub> is also preferable pathway on the Pt-doped Cu(111) surface. However, our present kinetic studies show that an activation barrier of 1.22 eV is required for hydrogenative dissociation into CH<sub>4</sub>, which is significantly higher than that of CH<sub>3</sub>O hydrogenative dissociation into CH<sub>3</sub>+OH (*ca.* 0.63 eV), as shown in Fig. S22. In the mean time, high activation barriers of 1.23 and 1.36 eV for CH<sub>3</sub>O direct and hydrogenation into CH<sub>3</sub>+O and CH<sub>3</sub>OH are also required. Thus, hydrogenative dissociation into CH<sub>3</sub> should be the most preferred reaction pathway among CH<sub>3</sub>O further reduction on the Pt-doped Cu(111) surface due to the lowest activation barrier.

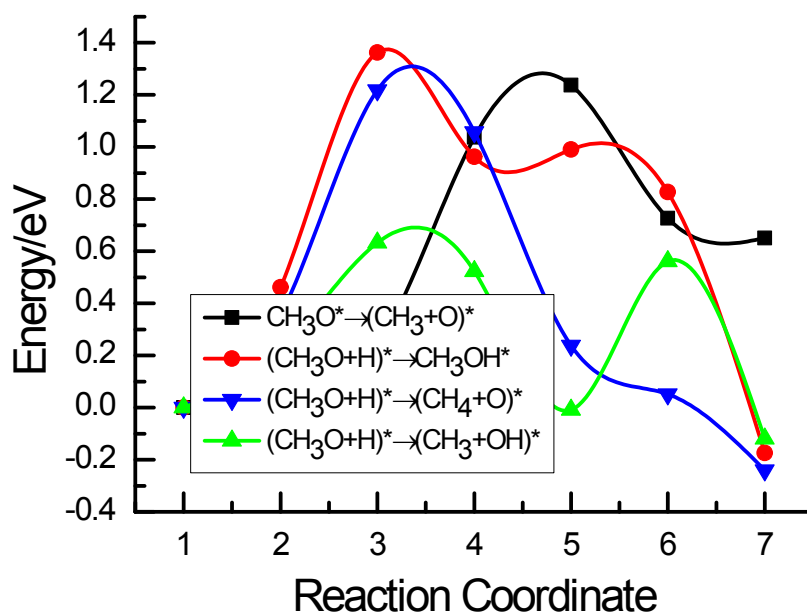

**Fig. S22** MEPs of CH<sub>3</sub>, CH<sub>4</sub> and CH<sub>3</sub>OH formation through CH<sub>3</sub>O direct dissociation, hydrogenative dissociation, and direct hydrogenation on the Pt-doped Cu(111) surface.

For intermediate CH<sub>2</sub>OH further reduction on the Pt-doped Cu(111) surface, there possible reaction pathways are considered, such as direct dissociation into adsorbed CH<sub>2</sub> through C-O bond breaking,

hydrogenative dissociation into adsorbed  $\text{CH}_2$ , and direct hydrogenation into  $\text{CH}_3\text{OH}$ . The reaction free energies of 0.58, 0.10, and -0.53 eV are required for these three reaction pathways, respectively, in which only  $\text{CH}_3\text{OH}$  formation is exothermic pathway. This indicates thermodynamically that  $\text{CH}_3\text{OH}$  formation is the most favorable among these three possibilities on the Pt-doped Cu(111) surface. Simultaneously, it is also observed in Fig. S23 that  $\text{CH}_3\text{OH}$  formation through  $\text{CH}_2\text{OH}$  direct hydrogenation has the lowest activation barrier (*ca.* 0.34 eV) than  $\text{CH}_2$  formation through direct and hydrogenative dissociation with activation barriers of 1.06 and 0.60 eV, respectively. Thus, the intermediate  $\text{CH}_2\text{OH}$  tends to form  $\text{CH}_3\text{OH}$  by direct hydrogenation on the Pt-doped Cu(111) surface, which is relatively more facile in contrast with  $\text{CH}_2$  formation.

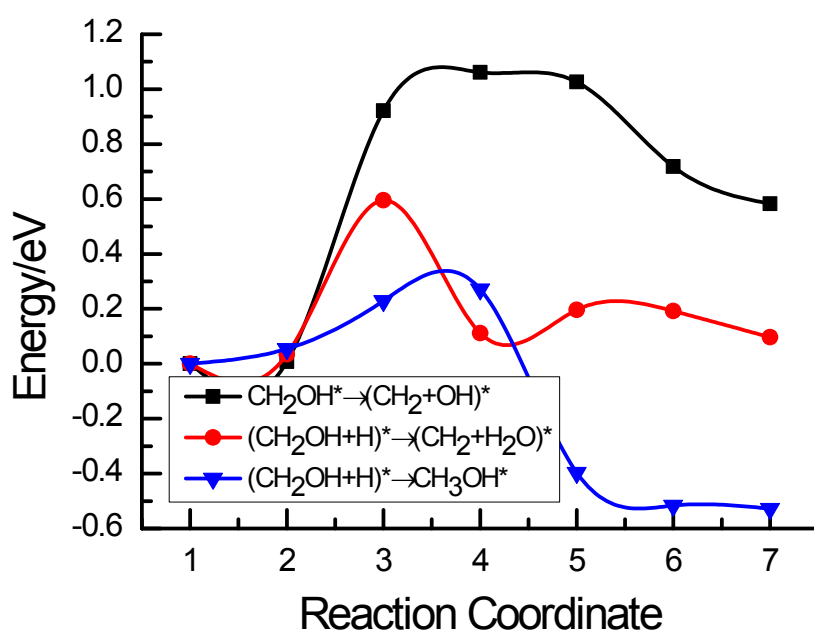

**Fig. S23** MEPs of  $\text{CH}_3\text{OH}$  and  $\text{CH}_2$  formation through direct hydrogenation, hydrogenative dissociation, and direct dissociation of  $\text{CH}_2\text{OH}$  on the Pt-doped Cu(111) surface.

#### 4.6 $\text{CH}_4$ formation pathways on the Pt-doped Cu(111) surface

Based on the above thermodynamic and kinetic analyses, the final  $\text{CH}_4$  production is possibly to be formed by intermediate  $\text{CH}_2$  serial hydrogenation and  $\text{CH}_3$  hydrogenation. Two possible formation pathways of  $\text{CH}_2$  have been shown above through  $\text{CHOH}$  hydrogenative dissociation and  $\text{CH}_2\text{OH}$  hydrogenative dissociation since they have nearly equal activation (*ca.* 0.53 and 0.60 eV) on the Pt-doped Cu(111) surface.  $\text{CH}_3$  can be formed through  $\text{CH}_3\text{O}$  hydrogenative dissociation. The MEPs of  $\text{CH}_4$  formation through intermediate  $\text{CH}_2$  serial hydrogenation is shown in Fig. S24. The reaction free energies are calculated as -0.95 and -0.82 eV for  $\text{CH}_3$  formation through  $\text{CH}_2$  hydrogenation and  $\text{CH}_4$  formation through  $\text{CH}_3$

hydrogenation, respectively. These two pathways are all strong exothermic processes, suggesting thermodynamically that they are easily to occur. The calculated activation barriers for the corresponding processes are 0.18 and 0.70 eV, respectively.

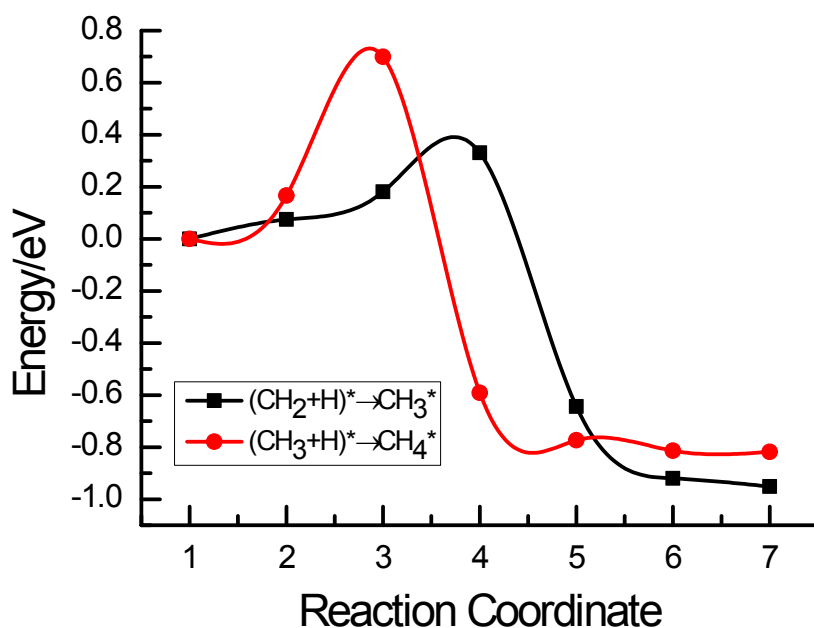

**Fig. S24** MEPs of hydrocarbons CH<sub>3</sub> and CH<sub>4</sub> formation through CH<sub>2</sub> serial hydrogenation on the Pt-doped Cu(111) surface.

## 5. Mathematical details about computational hydrogen electrode model<sup>3</sup>

In this technique, zero voltage is defined based on the reversible hydrogen electrode (RHE), in which the reaction

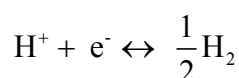

is defined to be in equilibrium at zero voltage, at all values of pH, at all temperatures, and with H<sub>2</sub> at 101325 Pa pressure. Therefore, in the computational hydrogen electrode (CHE) model, the chemical potential of a proton-electron pair,  $\mu(\text{H}^+) + \mu(\text{e}^-)$  is equal to half of the chemical potential of gaseous hydrogen ( $\frac{1}{2}\mu(\text{H}_2)$ ) at a potential of 0 V. In this way, the chemical potential of proton-electron pair can be calculated simply by calculating the chemical potential of gas-phase H<sub>2</sub>. The chemical potential of the proton-electron pair can be adjusted as a function of the applied potential by the standard relation between chemical and electrode potential,  $\Delta G = -eE$ , where  $e$  is the elementary positive charge and  $E$  is the applied bias. Since the RHE is defined to be at 0 V at all pH values, a pH correction is not needed. Thus, the total chemical potential of the proton-electron pair as a function of applied potential, at all temperature and pH values, can

be calculated as

$$\mu(\text{H}^+) + \mu(\text{e}^-) = \frac{1}{2} \mu(\text{H}_{2(\text{g})}) - eE$$

As an example, to calculate the free energy change from adsorbed CHO to adsorbed CH<sub>2</sub>O, the free energy change of the below chemical reaction needs to be calculated:

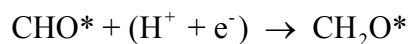

Where an asterisk (\*) indicates that the species is adsorbed on the copper surface. The free energy change of this reaction would thus be:

$$\begin{aligned} \Delta G &= \mu(\text{CH}_2\text{O}^*) - \mu(\text{CHO}^*) - [\mu(\text{H}^+) + \mu(\text{e}^-)] \\ &= \mu(\text{CH}_2\text{O}^*) - \mu(\text{CHO}^*) - \left[ \frac{1}{2} \mu(\text{H}_{2(\text{g})}) - eE \right] \end{aligned}$$

Thus, the CHE model allows the potential ( $E$ ) to be explicitly contained within the free energy change of each step.

## References

- 1 L. H. Ou, Chemical and Electrochemical Hydrogenation of CO<sub>2</sub> to Hydrocarbons on Cu Single Crystal Surfaces: Insights into the Mechanism and Selectivity from DFT Calculations. *RSC Adv.*, 2015, **5**, 57361-57371.
- 2 A. A. Peterson, F. Abild-Pedersen, F. Studt, J. Rossmeisl, J. K. Nørskov, How Copper Catalyzes the Electroreduction of Carbon Dioxide into Hydrocarbon Fuels. *Energy Environ. Sci.*, 2010, **3**, 1311-1315.
- 3 J. K. Nørskov, J. Rossmeisl, A. Logadottir, L. Lindqvist, J. R. Kitchin, T. Bligaard and H. Jónsson, Origin of the Overpotential for Oxygen Reduction at a Fuel-Cell Cathode. *J. Phys. Chem. B*, 2004, **108**, 17886-17892.
